# Supplementary material for: Role of gut microbiota in post-operative atrial fibrillation: a randomized trial of berberine
Source: Research Square preprint supplement (doi:10.21203/rs.3.rs-1119896/v1), 2022-01-12
Supplement: Supplementary file 1 [file cd275026f360807553157aba.docx]

Secondary Outcomes and AF-Related Measurements

|  | Berberine | placebo | P |
| --- | --- | --- | --- |
| Atrial fibrillation burden（%） | 0.00（0.00-0.00） | 0.00（0.00-2.42） | **0.012** |
| Maximum time of atrial fibrillation（hours） | 0.00（0.00-0.00） | 0.00（0.00-0.92） | **0.014** |
| Maximum ventricular rate during atrial fibrillation (beat/minute） | 0.00（0.00-0.00） | 0.00（0.00-152.00） | **0.008** |
| Mean ventricular rate during atrial fibrillation (beat/minute） | 0.00（0.00-0.00） | 0.00（0.00-101.00） | **0.012** |
| cardioversion，% | 0 | 3（3） | 0.246 |
| amiodarone，% | 16（16） | 31（31） | **0.012** |
|  |  |  |  |

Atrial fibrillation burden, defined as the percentage of time spent in AF during the 7-day monitoring period following CABG. Values are n or median (1st, 3rd quartile). No adjustments for multiple testing were made.

Secondary Outcomes and Clinical Outcomes

|  | Berberine | placebo | P |
| --- | --- | --- | --- |
| ICU stay time（hours） | 22.00（20.00-26.00） | 21.00（19.00-41.75） | 0.384 |
| Postoperative ventilator support time（hours） | 20.00（18.00-22.00） | 20.00（18.00-22.75） | 0.443 |
| length of hospitalization (days) | 9.00（8.00-12.00） | 10.00（8.25-12.00） | 0.167 |
| Blood transfusion (%) | 33(33） | 35（35） | 0.765 |
| 0 u | 67（67） | 65（65） | 0.607 |
| 1-2 u | 26（26） | 24（24) |
| ＞2 u | 7（7) | 11（11） |
| Post-operative EF（%） | 0.57（0.53-0.60） | 0.57（0.53-0.59） | 0.814 |
| Graft vessels | 3（3-3） | 3（3-4） | 0.959 |
